# Supplementary Tables

**Supplementary Table 1: Crude and Adjusted odds ratios for factors associated with overweight and obesity compared to normal weight among women of Nepal, NDHS 2016.**

| Variable                            | Model 1          |             |             | Model 2          |             |             | Model 3 |             |             |
|-------------------------------------|------------------|-------------|-------------|------------------|-------------|-------------|---------|-------------|-------------|
|                                     | OR               | Lower Limit | Upper Limit | OR               | Lower Limit | Upper Limit | OR      | Lower Limit | Upper Limit |
| <b>Age Group (in years)</b>         |                  |             |             |                  |             |             |         |             |             |
| 15-24                               | Ref              |             |             |                  |             |             | Ref     |             |             |
| 25-34                               | 3.8***           | 3.3         | 4.5         |                  |             |             | 2.3***  | 1.9         | 2.8         |
| 35-49                               | 5.6***           | 4.8         | 6.5         |                  |             |             | 3.7***  | 3.0         | 4.6         |
| <b>Place of Residence</b>           |                  |             |             |                  |             |             |         |             |             |
| Rural                               | Ref              |             |             | Ref              |             |             | Ref     |             |             |
| Urban                               | 1.6***           | 1.3         | 2.0         | 1.1 <sup>1</sup> | 0.9         | 1.4         | 1.1     | 0.9         | 1.4         |
| <b>Province of Residence</b>        |                  |             |             |                  |             |             |         |             |             |
| Province 1                          | Ref              |             |             |                  |             |             | Ref     |             |             |
| Province 2                          | 0.4***           | 0.3         | 0.5         |                  |             |             | 0.4***  | 0.3         | 0.5         |
| Province 3                          | 1.4*             | 1.1         | 1.9         |                  |             |             | 1.2     | 0.9         | 1.5         |
| Province 4                          | 1.3 <sup>1</sup> | 0.9         | 1.7         |                  |             |             | 1.2     | 0.9         | 1.5         |
| Province 5                          | 0.7*             | 0.5         | 0.9         |                  |             |             | 0.7**   | 0.6         | 0.9         |
| Province 6                          | 0.5***           | 0.3         | 0.6         |                  |             |             | 0.6***  | 0.5         | 0.8         |
| Province 7                          | 0.3***           | 0.2         | 0.4         |                  |             |             | 0.4***  | 0.3         | 0.5         |
| <b>Ecological Zone of Residence</b> |                  |             |             |                  |             |             |         |             |             |
| Mountain                            | Ref              |             |             |                  |             |             | Ref     |             |             |
| Hill                                | 1.5*             | 1.0         | 2.2         |                  |             |             | 0.8     | 0.7         | 1.1         |
| The Terai                           | 1.1              | 0.7         | 1.6         |                  |             |             | 0.7*    | 0.5         | 0.9         |
| <b>Highest Educational</b>          |                  |             |             |                  |             |             |         |             |             |

|                                   |         |     |     |     |         |         |
|-----------------------------------|---------|-----|-----|-----|---------|---------|
| <b>Status</b>                     |         |     |     |     |         |         |
| No Formal Education               | Ref     |     |     |     | Ref     |         |
| Primary                           | 1.3*    | 1.1 | 1.5 |     | 1.6**** | 1.3 1.9 |
| Secondary                         | 0.6**** | 0.6 | 0.7 |     | 1.4**** | 1.2 1.7 |
| Higher                            | 0.6**** | 0.5 | 0.7 |     | 1.2**** | 0.9 1.5 |
| <b>Currently employment</b>       |         |     |     |     |         |         |
| No                                | Ref     |     |     |     | Ref     |         |
| Yes                               | 1.3     | 1.2 | 1.5 |     | 1.0     | 0.8 1.1 |
| <b>Wealth index</b>               |         |     |     |     |         |         |
| Poorest                           | Ref     |     |     |     | Ref     |         |
| Poorer                            | 1.4**   | 1.1 | 1.7 |     | 1.4**   | 1.1 1.7 |
| Middle                            | 1.5**** | 1.2 | 1.9 |     | 1.6**** | 1.2 1.9 |
| Richer                            | 2.3**** | 1.9 | 2.9 |     | 2.1**** | 1.7 2.7 |
| Rich                              | 5.1**** | 4.1 | 6.4 |     | 4.5**** | 3.5 5.8 |
| <b>Marital Status</b>             |         |     |     |     |         |         |
| Single                            | Ref     |     |     |     | Ref     |         |
| Married                           | 5.1**** | 4.3 | 6.1 |     | 2.1**** | 1.6 2.8 |
| Separated/ Divorced/<br>Widowed   | 4.3**** | 3.0 | 6.2 |     | 1.6*    | 1.0 2.4 |
| <b>Parity</b>                     |         |     |     |     |         |         |
| 0                                 | Ref     |     |     |     | Ref     |         |
| 1                                 | 2.7**** | 2.2 | 3.3 |     | 1.1     | 0.8 1.5 |
| 2                                 | 5.2**** | 4.4 | 6.3 |     | 1.4*    | 1.1 1.8 |
| 3                                 | 5.4**** | 4.4 | 6.6 |     | 1.4*    | 1.0 1.9 |
| 3+                                | 4.2**** | 3.5 | 5.1 |     | 1.1     | 0.8 1.6 |
| <b>Number of Household Member</b> |         |     |     |     |         |         |
| ≤5                                | Ref     |     |     |     | Ref     |         |
| >5                                | 0.7**** | 0.6 | 0.8 |     | 0.9     | 0.8 1.0 |
| <b>Frequency of watching TV</b>   |         |     |     |     |         |         |
| Not at all                        | Ref     |     |     | Ref | Ref     |         |

|                                                                             |        |     |     |                  |     |     |      |     |     |
|-----------------------------------------------------------------------------|--------|-----|-----|------------------|-----|-----|------|-----|-----|
| Less than once a week                                                       | 1.1    | 0.9 | 1.3 | 1.2 <sup>1</sup> | 0.9 | 1.5 | 1.2  | 0.9 | 1.5 |
| At least once a week                                                        | 1.7*** | 1.5 | 2.0 | 1.8***           | 1.5 | 2.3 | 1.3* | 1.0 | 1.7 |
| <b>Interaction Between Place of Residence with Frequency of Watching TV</b> |        |     |     |                  |     |     |      |     |     |
| Urban Residence × Not at all watches TV                                     |        |     |     | Ref              |     |     | Ref  |     |     |
| Urban Residence × Watches TV less than once a week                          |        |     |     | 1.0              | 0.7 | 1.4 | 0.9  | 0.6 | 1.2 |
| Urban Residence × Watches TV at least once a week                           |        |     |     | 1.3*             | 1.0 | 1.8 | 1.0  | 0.7 | 1.3 |

NDHS: Nepal Demographic and Health Survey

CI: Confidence Interval

<sup>1</sup>Variable with p-value less than <0.2 from unadjusted model were included into multivariable analysis

\*p-value<0.05, \*\*p-value<0.01, \*\*\* p-value<0.001

Model 1 shows Crude Odds Ratio (COR), Model 2 shows interaction between place of residence and frequency of watching television, Model 3 shows Adjusted Odds Ratio (AOR)

**Supplementary Table 2: Crude odds ratios for factors associated with overweight and obesity compared to normal weight for urban area among women of Nepal, NDHS 2016.**

| Variable                            | COR              | Lower Limit | Upper Limit | AOR    | Lower Limit | Upper Limit |
|-------------------------------------|------------------|-------------|-------------|--------|-------------|-------------|
| <b>Age Group (in years)</b>         |                  |             |             |        |             |             |
| 15-24                               | Ref              |             |             | Ref    |             |             |
| 25-34                               | 4.0***           | 3.3         | 4.8         | 2.3*** | 1.8         | 2.9         |
| 35-49                               | 6.5***           | 5.4         | 7.8         | 3.9*** | 2.9         | 5.1         |
| <b>Province of Residence</b>        |                  |             |             |        |             |             |
| Province 1                          | Ref              |             |             | Ref    |             |             |
| Province 2                          | 0.4***           | 0.3         | 0.5         | 0.4*** | 0.3         | 0.5         |
| Province 3                          | 1.3 <sup>1</sup> | 0.9         | 1.9         | 1.0    | 0.8         | 1.4         |
| Province 4                          | 1.2              | 0.8         | 1.8         | 1.2    | 0.9         | 1.6         |
| Province 5                          | 0.7 <sup>1</sup> | 0.5         | 1.0         | 0.6    | 0.5         | 0.9         |
| Province 6                          | 0.5**            | 0.4         | 0.8         | 0.8    | 0.5         | 1.1         |
| Province 7                          | 0.3***           | 0.2         | 0.4         | 0.4*** | 0.3         | 0.5         |
| <b>Ecological Zone of Residence</b> |                  |             |             |        |             |             |
| Mountain                            | Ref              |             |             | Ref    |             |             |
| Hill                                | 1.4              | 0.8         | 2.5         |        |             |             |
| The Terai                           | 1.0              | 0.5         | 1.8         |        |             |             |
| <b>Highest Educational Status</b>   |                  |             |             |        |             |             |
| No Formal Education                 | Ref              |             |             | Ref    |             |             |
| Primary                             | 1.2 <sup>1</sup> | 1.0         | 1.5         | 1.4**  | 1.2         | 1.8         |
| Secondary                           | 0.6***           | 0.5         | 0.8         | 1.3*   | 1.0         | 1.6         |
| Higher                              | 0.5***           | 0.4         | 0.7         | 1.1    | 0.8         | 1.4         |
| <b>Currently employment</b>         |                  |             |             |        |             |             |
| No                                  | Ref              |             |             | Ref    |             |             |
| Yes                                 | 1.3***           | 1.1         | 1.5         | 1.0    | 0.8         | 1.1         |
| <b>Wealth index</b>                 |                  |             |             |        |             |             |
| Poorest                             | Ref              |             |             | Ref    |             |             |

|                                   |                  |     |     |        |     |     |
|-----------------------------------|------------------|-----|-----|--------|-----|-----|
| Poorer                            | 1.2 <sup>1</sup> | 0.9 | 1.6 | 1.2    | 0.9 | 1.6 |
| Middle                            | 1.6**            | 1.2 | 2.1 | 1.4*   | 1.1 | 2.0 |
| Richer                            | 2.4***           | 1.8 | 3.2 | 2.2*** | 1.6 | 3.0 |
| Rich                              | 5.0***           | 3.7 | 6.7 | 4.3*** | 3.0 | 6.1 |
| <b>Marital Status</b>             |                  |     |     |        |     |     |
| Single                            | Ref              |     |     | Ref    |     |     |
| Married                           | 5.9***           | 4.8 | 7.3 | 2.1*** | 1.5 | 3.0 |
| Separated/ Divorced/ Widowed      | 4.5***           | 2.9 | 7.0 | 1.5    | 0.9 | 2.6 |
| <b>Parity</b>                     |                  |     |     |        |     |     |
| 0                                 | Ref              |     |     | Ref    |     |     |
| 1                                 | 3.2***           | 2.5 | 4.1 | 1.3    | 0.9 | 1.8 |
| 2                                 | 5.9***           | 4.8 | 7.3 | 1.5**  | 1.1 | 2.2 |
| 3                                 | 5.9***           | 4.7 | 7.5 | 1.5    | 1.0 | 2.1 |
| 3+                                | 4.8***           | 3.8 | 6.1 | 1.2    | 0.8 | 1.9 |
| <b>Number of Household Member</b> |                  |     |     |        |     |     |
| ≤5                                | Ref              |     |     | Ref    |     |     |
| >5                                | 0.7***           | 0.6 | 0.9 | 0.9    | 0.8 | 1.1 |
| <b>Frequency of watching TV</b>   |                  |     |     |        |     |     |
| Not at all                        | Ref              |     |     | Ref    |     |     |
| Less than once a week             | 1.1              | 0.9 | 1.4 | 1.1    | 0.8 | 1.4 |
| At least once a week              | 1.8***           | 1.5 | 2.2 | 1.4**  | 1.1 | 1.7 |

NDHS: Nepal Demographic and Health Survey

CI: Confidence Interval

AOR: Adjusted Odds Ratio

COR: Crude Odds Ratio

<sup>1</sup>Variable with p-value less than <0.2 from unadjusted model were included into multivariable analysis

*\*p-value<0.05, \*\*p-value<0.01, \*\*\* p-value<0.001*

**Supplementary Table 3: Adjusted odds ratios for factors associated with overweight and obesity compared to normal weight for rural area among women of Nepal, NDHS 2016.**

| Variable                            | COR              | Lower Limit | Upper Limit | AOR                                 | Lower Limit | Upper Limit |
|-------------------------------------|------------------|-------------|-------------|-------------------------------------|-------------|-------------|
| <b>Age Group (in years)</b>         |                  |             |             |                                     |             |             |
| 15-24                               | Ref              |             |             | Ref                                 |             |             |
| 25-34                               | 3.4***           | 2.6         | 4.5         | 2.5***                              | 1.7         | 3.5         |
| 35-49                               | 4.1***           | 3.1         | 5.3         | 3.4***                              | 2.3         | 5.1         |
| <b>Province of Residence</b>        |                  |             |             |                                     |             |             |
| Province 1                          | Ref              |             |             | Ref                                 |             |             |
| Province 2                          | 0.4***           | 0.2         | 0.6         | 0.3***                              | 0.2         | 0.5         |
| Province 3                          | 1.6*             | 1.0         | 2.6         | 2.3***                              | 1.4         | 3.6         |
| Province 4                          | 1.4 <sup>1</sup> | 0.9         | 2.2         | 1.5*                                | 1.0         | 2.4         |
| Province 5                          | 0.7 <sup>1</sup> | 0.5         | 1.1         | 0.7                                 | 0.5         | 1.1         |
| Province 6                          | 0.3***           | 0.2         | 0.5         | 0.5*                                | 0.3         | 0.9         |
| Province 7                          | 0.4***           | 0.2         | 0.6         | 0.4**                               | 0.3         | 0.7         |
| <b>Ecological Zone of Residence</b> |                  |             |             |                                     |             |             |
| Mountain                            | Ref              |             |             | Not incorporated in the final model |             |             |
| Hill                                | 1.3              | 0.8         | 2.1         |                                     |             |             |
| The Terai                           | 0.9              | 0.6         | 1.5         |                                     |             |             |
| <b>Highest Educational Status</b>   |                  |             |             |                                     |             |             |
| No Formal Education                 | Ref              |             |             | Ref                                 |             |             |
| Primary                             | 1.3 <sup>1</sup> | 1.0         | 1.7         | 1.8***                              | 1.3         | 2.4         |
| Secondary                           | 0.6**            | 0.5         | 0.8         | 1.4*                                | 1.0         | 2.0         |
| Higher                              | 0.7 <sup>1</sup> | 0.5         | 1.0         | 1.2                                 | 0.8         | 2.0         |
| <b>Currently employment</b>         |                  |             |             |                                     |             |             |
| No                                  | Ref              |             |             | Ref                                 |             |             |
| Yes                                 | 1.3              | 1.0         | 1.7         |                                     |             |             |
| <b>Wealth index</b>                 |                  |             |             |                                     |             |             |
| Poorest                             | Ref              |             |             | Ref                                 |             |             |
| Poorer                              | 1.6**            | 1.2         | 2.2         | 1.5**                               | 1.1         | 2.1         |

|                                   |        |     |     |        |     |     |
|-----------------------------------|--------|-----|-----|--------|-----|-----|
| Middle                            | 1.5*   | 1.0 | 2.0 | 1.7**  | 1.2 | 2.5 |
| Richer                            | 2.0*** | 1.4 | 2.9 | 2.2*** | 1.5 | 3.3 |
| Rich                              | 4.7*** | 2.8 | 7.8 | 5.0*** | 2.9 | 8.6 |
| <b>Marital Status</b>             |        |     |     |        |     |     |
| Single                            | Ref    |     |     | Ref    |     |     |
| Married                           | 3.6*** | 2.6 | 5.0 | 1.8*   | 1.0 | 3.1 |
| Separated/ Divorced/ Widowed      | 3.6*** | 2.0 | 6.7 | 1.4    | 0.6 | 3.0 |
| <b>Parity</b>                     |        |     |     |        |     |     |
| 0                                 | Ref    |     |     | Ref    |     |     |
| 1                                 | 1.7**  | 1.1 | 2.4 | 0.8    | 0.5 | 1.4 |
| 2                                 | 3.7*** | 2.6 | 5.2 | 1.3    | 0.7 | 2.1 |
| 3                                 | 4.3*** | 3.1 | 6.1 | 1.3    | 0.8 | 2.3 |
| 3+                                | 3.2*** | 2.3 | 4.4 | 1.0    | 0.6 | 1.9 |
| <b>Number of Household Member</b> |        |     |     |        |     |     |
| ≤5                                | Ref    |     |     | Ref    |     |     |
| >5                                | 0.7*** | 0.5 | 0.8 | 0.8    | 0.7 | 1.0 |
| <b>Frequency of watching TV</b>   |        |     |     |        |     |     |
| Not at all                        | Ref    |     |     | Ref    |     |     |
| Less than once a week             | 1.0    | 0.8 | 1.3 | 1.0    | 0.7 | 1.3 |
| At least once a week              | 1.4**  | 1.1 | 1.9 | 1.1    | 0.8 | 1.5 |

NDHS: Nepal Demographic and Health Survey

CI: Confidence Interval

AOR: Adjusted Odds Ratio

COR: Crude Odds Ratio

<sup>1</sup>Variable with p-value less than <0.2 from unadjusted model were included into multivariable analysis

\*p-value<0.05, \*\*p-value<0.01, \*\*\* p-value<0.001

**Supplementary Table 4: Crude and Adjusted odds ratios for factors associated with overweight and obesity (using traditional BMI-cutoff) compared to normal weight among women of Nepal, NDHS 2016.**

| Variable                            | Model 1 |             |             | Model 2 |             |             | Model 3 |             |             |
|-------------------------------------|---------|-------------|-------------|---------|-------------|-------------|---------|-------------|-------------|
|                                     | OR      | Lower Limit | Upper Limit | OR      | Lower Limit | Upper Limit | OR      | Lower Limit | Upper Limit |
| <b>Age Group (in years)</b>         |         |             |             |         |             |             |         |             |             |
| 15-24                               | Ref     |             |             |         |             |             | Ref     |             |             |
| 25-34                               | 5.8     | 4.7         | 7.2         |         |             |             | 3.1     | 2.4         | 4.0         |
| 35-49                               | 8.6     | 7.0         | 10.6        |         |             |             | 4.9     | 3.7         | 6.6         |
| <b>Place of Residence</b>           |         |             |             |         |             |             |         |             |             |
| Rural                               | Ref     |             |             | Ref     |             |             | Ref     |             |             |
| Urban                               | 1.8     | 1.4         | 2.3         | 1.1     | 0.8         | 1.4         | 0.9     | 0.7         | 1.3         |
| <b>Province of Residence</b>        |         |             |             |         |             |             |         |             |             |
| Province 1                          | Ref     |             |             |         |             |             | Ref     |             |             |
| Province 2                          | 0.3     | 0.2         | 0.5         |         |             |             | 0.4     | 0.3         | 0.5         |
| Province 3                          | 1.3     | 0.9         | 1.8         |         |             |             | 1.0     | 0.8         | 1.3         |
| Province 4                          | 1.1     | 0.8         | 1.6         |         |             |             | 1.0     | 0.8         | 1.3         |
| Province 5                          | 0.6     | 0.4         | 0.9         |         |             |             | 0.6     | 0.5         | 0.8         |
| Province 6                          | 0.3     | 0.2         | 0.5         |         |             |             | 0.5     | 0.4         | 0.7         |
| Province 7                          | 0.2     | 0.1         | 0.3         |         |             |             | 0.3     | 0.2         | 0.4         |
| <b>Ecological Zone of Residence</b> |         |             |             |         |             |             |         |             |             |
| Mountain                            | Ref     |             |             |         |             |             | Ref     |             |             |
| Hill                                | 1.6     | 1.0         | 2.5         |         |             |             | 0.8     | 0.6         | 1.1         |

|                                   |     |     |      |  |     |     |     |
|-----------------------------------|-----|-----|------|--|-----|-----|-----|
| The Terai                         | 1.3 | 0.8 | 2.0  |  | 0.6 | 0.5 | 0.9 |
| <b>Highest Educational Status</b> |     |     |      |  |     |     |     |
| No Formal Education               | Ref |     |      |  | Ref |     |     |
| Primary                           | 1.2 | 1.0 | 1.5  |  | 1.4 | 1.2 | 1.8 |
| Secondary                         | 0.6 | 0.5 | 0.8  |  | 1.2 | 1.0 | 1.5 |
| Higher                            | 0.6 | 0.5 | 0.8  |  | 1.1 | 0.9 | 1.5 |
| <b>Currently employment</b>       |     |     |      |  |     |     |     |
| No                                | Ref |     |      |  | Ref |     |     |
| Yes                               | 1.2 | 1.1 | 1.4  |  | 0.9 | 0.8 | 1.0 |
| <b>Wealth index</b>               |     |     |      |  |     |     |     |
| Poorest                           | Ref |     |      |  | Ref |     |     |
| Poorer                            | 1.9 | 1.5 | 2.6  |  | 1.9 | 1.4 | 2.5 |
| Middle                            | 2.1 | 1.6 | 2.7  |  | 2.0 | 1.5 | 2.7 |
| Richer                            | 3.5 | 2.6 | 4.6  |  | 3.1 | 2.3 | 4.2 |
| Rich                              | 8.0 | 6.1 | 10.6 |  | 7.1 | 5.1 | 9.8 |
| <b>Marital Status</b>             |     |     |      |  |     |     |     |
| Single                            | Ref |     |      |  | Ref |     |     |
| Married                           | 9.1 | 6.9 | 12.0 |  | 3.1 | 2.1 | 4.7 |
| Separated/ Divorced/<br>Widowed   | 8.0 | 5.0 | 12.7 |  | 2.5 | 1.5 | 4.4 |
| <b>Parity</b>                     |     |     |      |  |     |     |     |
| 0                                 | Ref |     |      |  | Ref |     |     |

|                                                                             |     |     |     |     |     |     |     |     |     |
|-----------------------------------------------------------------------------|-----|-----|-----|-----|-----|-----|-----|-----|-----|
| 1                                                                           | 4.0 | 3.1 | 5.2 |     |     |     | 1.1 | 0.8 | 1.6 |
| 2                                                                           | 7.7 | 6.1 | 9.8 |     |     |     | 1.3 | 0.9 | 1.8 |
| 3                                                                           | 7.3 | 5.6 | 9.4 |     |     |     | 1.2 | 0.8 | 1.7 |
| 3+                                                                          | 5.8 | 4.4 | 7.5 |     |     |     | 1.0 | 0.7 | 1.5 |
| <b>Number of Household Member</b>                                           |     |     |     |     |     |     |     |     |     |
| ≤5                                                                          | Ref |     |     |     |     |     | Ref |     |     |
| >5                                                                          | 0.7 | 0.6 | 0.8 |     |     |     | 0.9 | 0.7 | 1.0 |
| <b>Frequency of watching TV</b>                                             |     |     |     |     |     |     |     |     |     |
| Not at all                                                                  | Ref |     |     | Ref |     |     | Ref |     |     |
| Less than once a week                                                       | 1.3 | 1.1 | 1.7 | 1.3 | 0.9 | 1.8 | 1.2 | 0.8 | 1.7 |
| At least once a week                                                        | 2.3 | 1.9 | 2.8 | 2.3 | 1.7 | 3.0 | 1.4 | 1.0 | 1.9 |
| <b>Interaction Between Place of Residence with Frequency of Watching TV</b> |     |     |     |     |     |     |     |     |     |
| Urban Residence × Not at all watches TV                                     |     |     |     | Ref |     |     | Ref |     |     |
| Urban Residence × Watches TV less than once a week                          |     |     |     | 1.2 | 0.8 | 1.8 | 1.1 | 0.7 | 1.7 |
| Urban Residence × Watches TV at least once a week                           |     |     |     | 1.4 | 1.0 | 2.0 | 1.1 | 0.7 | 1.6 |

*BMI: Body Mass Index*

*NDHS: Nepal Demographic and Health Survey*

*CI: Confidence Interval*

*<sup>1</sup>Variable with p-value less than <0.2 from unadjusted model were included into multivariable analysis*

*\*p-value<0.05, \*\*p-value<0.01, \*\*\* p-value<0.001*

*Model 1 shows Crude Odds Ratio (COR), Model 2 shows interaction between place of residence and frequency of watching television, Model 3 shows Adjusted Odds Ratio (AOR)*

**Supplementary Table 5: Crude odds ratios for factors associated with overweight and obesity (using traditional BMI-cutoff) compared to normal weight for urban area among women of Nepal, NDHS 2016.**

| Variable                            | COR | Lower Limit | Upper Limit | AOR | Lower Limit | Upper Limit |
|-------------------------------------|-----|-------------|-------------|-----|-------------|-------------|
| <b>Age Group (in years)</b>         |     |             |             |     |             |             |
| 15-24                               | Ref |             |             | Ref |             |             |
| 25-34                               | 6.2 | 4.8         | 8.0         | 3.1 | 2.3         | 4.3         |
| 35-49                               | 9.9 | 7.7         | 12.7        | 5.0 | 3.6         | 7.1         |
| <b>Province of Residence</b>        |     |             |             |     |             |             |
| Province 1                          | Ref |             |             | Ref |             |             |
| Province 2                          | 0.4 | 0.2         | 0.6         | 0.4 | 0.3         | 0.6         |
| Province 3                          | 1.3 | 0.9         | 2.0         | 0.9 | 0.6         | 1.2         |
| Province 4                          | 1.2 | 0.8         | 1.9         | 1.0 | 0.7         | 1.4         |
| Province 5                          | 0.6 | 0.4         | 0.9         | 0.6 | 0.4         | 0.8         |
| Province 6                          | 0.4 | 0.3         | 0.7         | 0.6 | 0.4         | 0.9         |
| Province 7                          | 0.2 | 0.1         | 0.3         | 0.3 | 0.2         | 0.4         |
| <b>Ecological Zone of Residence</b> |     |             |             |     |             |             |
| Mountain                            | Ref |             |             | Ref |             |             |
| Hill                                | 1.6 | 0.7         | 3.2         | 1.0 | 0.6         | 1.5         |
| The Terai                           | 1.0 | 0.5         | 2.2         | 0.7 | 0.5         | 1.2         |
| <b>Highest Educational Status</b>   |     |             |             |     |             |             |
| No Formal Education                 | Ref |             |             | Ref |             |             |
| Primary                             | 1.2 | 0.9         | 1.6         | 1.4 | 1.1         | 1.8         |
| Secondary                           | 0.6 | 0.5         | 0.8         | 1.2 | 0.9         | 1.5         |
| Higher                              | 0.5 | 0.4         | 0.7         | 1.1 | 0.8         | 1.5         |
| <b>Currently Employed</b>           |     |             |             |     |             |             |
| No                                  | Ref |             |             | Ref |             |             |
| Yes                                 | 1.3 | 1.1         | 1.5         | 0.9 | 0.7         | 1.0         |
| <b>Wealth Index</b>                 |     |             |             |     |             |             |
| Poorest                             | Ref |             |             | Ref |             |             |
| Poorer                              | 1.8 | 1.2         | 2.7         | 1.7 | 1.1         | 2.5         |
| Middle                              | 2.1 | 1.4         | 3.1         | 1.8 | 1.2         | 2.8         |

|                                    |      |     |      |     |     |      |
|------------------------------------|------|-----|------|-----|-----|------|
| Richer                             | 3.6  | 2.4 | 5.3  | 2.9 | 1.9 | 4.3  |
| Rich                               | 8.1  | 5.5 | 11.9 | 6.7 | 4.4 | 10.2 |
| <b>Marital Status</b>              |      |     |      |     |     |      |
| Single                             | Ref  |     |      | Ref |     |      |
| Married                            | 10.6 | 7.6 | 14.6 | 3.2 | 2.0 | 5.2  |
| Separated/Divorced/Widowed         | 6.8  | 3.8 | 12.1 | 2.2 | 1.1 | 4.3  |
| <b>Parity</b>                      |      |     |      |     |     |      |
| 0                                  | Ref  |     |      | Ref |     |      |
| 1                                  | 5.0  | 3.6 | 6.8  | 1.3 | 0.8 | 2.0  |
| 2                                  | 8.7  | 6.5 | 11.4 | 1.3 | 0.9 | 2.0  |
| 3                                  | 7.8  | 5.7 | 10.7 | 1.2 | 0.8 | 1.9  |
| 3+                                 | 7.1  | 5.2 | 9.8  | 1.2 | 0.7 | 1.9  |
| <b>Number of Household Members</b> |      |     |      |     |     |      |
| ≤5                                 | Ref  |     |      | Ref |     |      |
| >5                                 | 0.7  | 0.6 | 0.9  | 0.9 | 0.8 | 1.1  |
| <b>Frequency of Watching TV</b>    |      |     |      |     |     |      |
| Not at All                         | Ref  |     |      | Ref |     |      |
| Less Than Once a Week              | 1.5  | 1.1 | 2.0  | 1.4 | 1.0 | 1.9  |
| At Least Once a Week               | 2.5  | 2.0 | 3.3  | 1.7 | 1.3 | 2.2  |

*BMI: Body Mass Index*

*NDHS: Nepal Demographic and Health Survey*

*CI: Confidence Interval*

*AOR: Adjusted Odds Ratio*

*COR: Crude Odds Ratio*

<sup>1</sup>Variable with p-value less than <0.2 from unadjusted model were included into multivariable analysis

\*p-value<0.05, \*\*p-value<0.01, \*\*\* p-value<0.001

**Supplementary Table 6: Crude odds ratios for factors associated with overweight and obesity (using traditional BMI-cutoff) compared to normal weight for rural area among women of Nepal, NDHS 2016.**

| Variable                            | COR | Lower Limit | Upper Limit | AOR                                 | Lower Limit | Upper Limit |
|-------------------------------------|-----|-------------|-------------|-------------------------------------|-------------|-------------|
| <b>Age Group (in years)</b>         |     |             |             |                                     |             |             |
| 15-24                               | Ref |             |             | Ref                                 |             |             |
| 25-34                               | 4.9 | 3.3         | 7.2         | 3.2                                 | 2.0         | 5.1         |
| 35-49                               | 6.1 | 4.2         | 9.0         | 4.9                                 | 2.9         | 8.4         |
| <b>Province of Residence</b>        |     |             |             |                                     |             |             |
| Province 1                          | Ref |             |             | Ref                                 |             |             |
| Province 2                          | 0.3 | 0.2         | 0.5         | 0.2                                 | 0.1         | 0.4         |
| Province 3                          | 1.0 | 0.6         | 1.7         | 1.5                                 | 0.9         | 2.4         |
| Province 4                          | 1.0 | 0.6         | 1.7         | 1.2                                 | 0.8         | 1.9         |
| Province 5                          | 0.6 | 0.4         | 1.1         | 0.6                                 | 0.4         | 1.0         |
| Province 6                          | 0.2 | 0.1         | 0.3         | 0.4                                 | 0.2         | 0.7         |
| Province 7                          | 0.3 | 0.1         | 0.5         | 0.3                                 | 0.2         | 0.6         |
| <b>Ecological Zone of Residence</b> |     |             |             |                                     |             |             |
| Mountain                            | Ref |             |             | Not incorporated in the final model |             |             |
| Hill                                | 1.1 | 0.6         | 2.0         |                                     |             |             |
| The Terai                           | 1.1 | 0.6         | 2.1         |                                     |             |             |
| <b>Highest Educational Status</b>   |     |             |             |                                     |             |             |
| No Formal Education                 | Ref |             |             | Ref                                 |             |             |
| Primary                             | 1.1 | 0.8         | 1.6         | 1.5                                 | 1.0         | 2.2         |
| Secondary                           | 0.6 | 0.5         | 0.9         | 1.4                                 | 1.0         | 2.1         |
| Higher                              | 0.8 | 0.5         | 1.2         | 1.3                                 | 0.8         | 2.3         |
| <b>Currently Employed</b>           |     |             |             |                                     |             |             |
| No                                  | Ref |             |             | Ref                                 |             |             |
| Yes                                 | 1.2 | 0.9         | 1.7         | 1.0                                 | 0.7         | 1.3         |
| <b>Wealth Index</b>                 |     |             |             |                                     |             |             |
| Poorest                             | Ref |             |             | Ref                                 |             |             |
| Poorer                              | 2.1 | 1.5         | 3.1         | 1.9                                 | 1.3         | 2.8         |
| Middle                              | 2.0 | 1.3         | 3.0         | 2.2                                 | 1.4         | 3.4         |

|                                    |     |     |      |     |     |      |
|------------------------------------|-----|-----|------|-----|-----|------|
| Richer                             | 3.1 | 2.0 | 4.9  | 3.1 | 2.0 | 5.0  |
| Rich                               | 7.5 | 4.2 | 13.4 | 7.2 | 3.9 | 13.3 |
| <b>Marital Status</b>              |     |     |      |     |     |      |
| Single                             | Ref |     |      | Ref |     |      |
| Married                            | 5.9 | 3.5 | 9.9  | 2.4 | 1.1 | 5.1  |
| Separated/Divorced/Widowed         | 9.2 | 4.2 | 20.3 | 2.8 | 1.1 | 7.3  |
| <b>Parity</b>                      |     |     |      |     |     |      |
| 0                                  | Ref |     |      | Ref |     |      |
| 1                                  | 2.1 | 1.3 | 3.6  | 0.7 | 0.4 | 1.5  |
| 2                                  | 5.3 | 3.3 | 8.3  | 1.2 | 0.6 | 2.3  |
| 3                                  | 5.8 | 3.6 | 9.1  | 1.2 | 0.6 | 2.3  |
| 3+                                 | 3.6 | 2.3 | 5.7  | 0.8 | 0.4 | 1.6  |
| <b>Number of Household Members</b> |     |     |      |     |     |      |
| ≤5                                 | Ref |     |      | Ref |     |      |
| >5                                 | 0.6 | 0.4 | 0.8  | 0.7 | 0.6 | 1.0  |
| <b>Frequency of Watching TV</b>    |     |     |      |     |     |      |
| Not at All                         | Ref |     |      | Ref |     |      |
| Less Than Once a Week              | 1.1 | 0.8 | 1.6  | 1.0 | 0.7 | 1.5  |
| At Least Once a Week               | 1.7 | 1.2 | 2.4  | 1.2 | 0.8 | 1.7  |

*BMI: Body Mass Index*

*NDHS: Nepal Demographic and Health Survey*

*CI: Confidence Interval*

*AOR: Adjusted Odds Ratio*

*COR: Crude Odds Ratio*

<sup>1</sup>Variable with p-value less than <0.2 from unadjusted model were included into multivariable analysis

\*p-value<0.05, \*\*p-value<0.01, \*\*\* p-value<0.0001
